# Supplementary material for: Choroidal pericytes promote subretinal fibrosis after experimental photocoagulation
Source: PubMed Central journal article supplement (PMC5963858; doi:10.1242/dmm.032060), 2018-04-23
Supplement: dmm-11-032060-s1.pdf [file dmm-11-032060-s1.pdf]

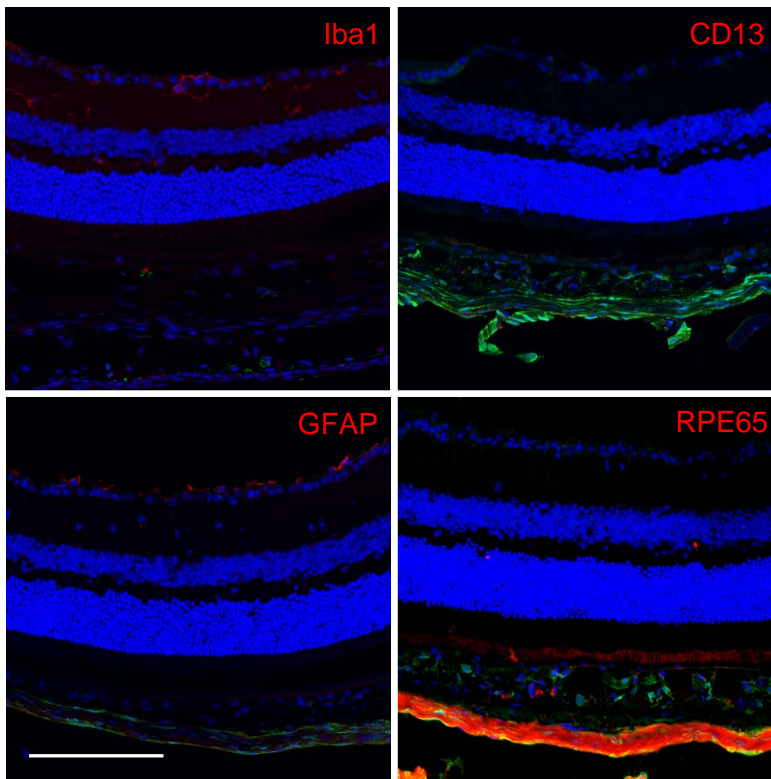

**Figure S1.** Representative images show cross sections of posterior eye isolated from Col1 $\alpha$ 1-GFP mice. Samples were immunostained with antibodies against Iba1, CD13, GFAP and RPE65 (n=5). All samples were counter-stained with DAPI (blue), GFP antibodies (green) and the third antibody (red) as shown. Scale bars: 100 $\mu$ m.

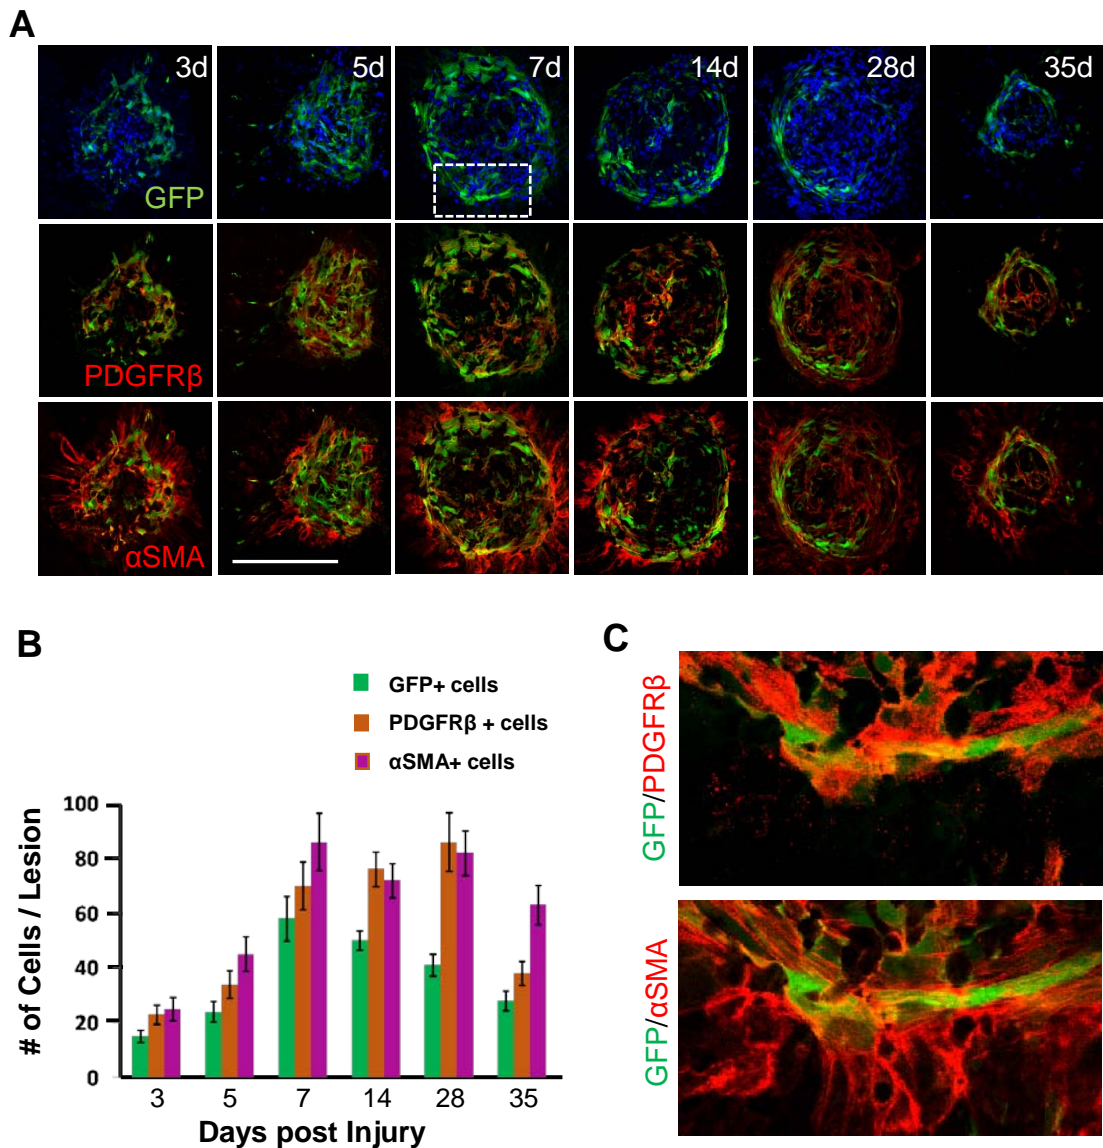

**Figure S2.** GFP-positive cells express PDGFR $\beta$  and  $\alpha$ SMA. A, B: The time course of GFP, PDGFR $\beta$  and  $\alpha$ SMA-positive cell distribution in subretinal space after laser-induced photocoagulation ( $n > 10$ ). C: GFP-positive cells are immunoreactive with antibodies against PDGFR $\beta$  and  $\alpha$ SMA. Scale bars: 100 $\mu$ m.

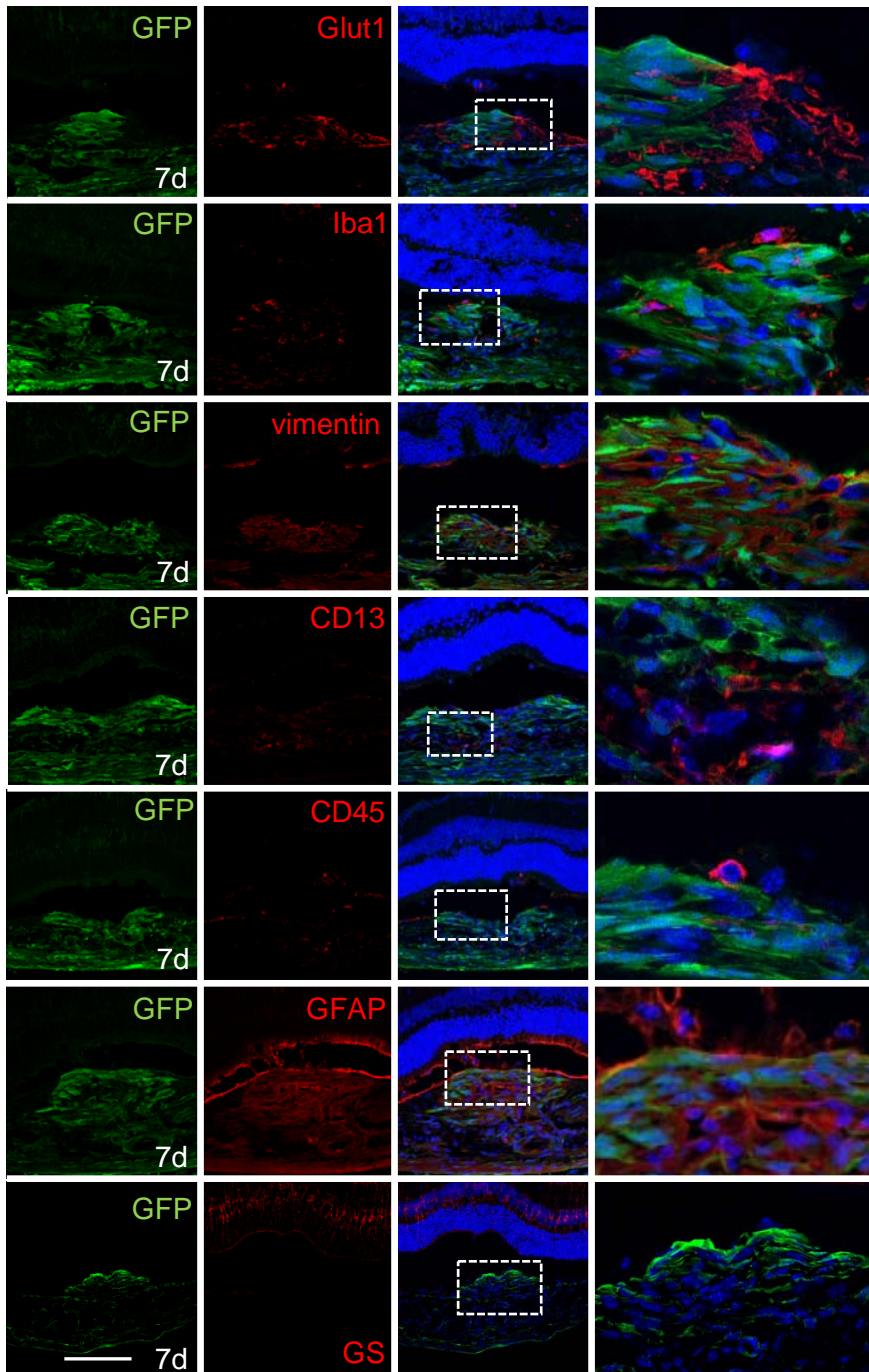

**Figure S3.** Representative images show cross sections of posterior eye isolated from Col1 $\alpha$ 1-GFP mice at 7 dpi. Samples with laser-induced lesions were immunostained with antibodies against Glut1, Iba1, vimentin, CD13, CD45, GFAP or glutamine synthetase (GS). All samples were counter-stained with DAPI (blue), GFP antibodies (green) and the third antibody (red) as shown (n=5). Scale bars: 100 $\mu$ m.

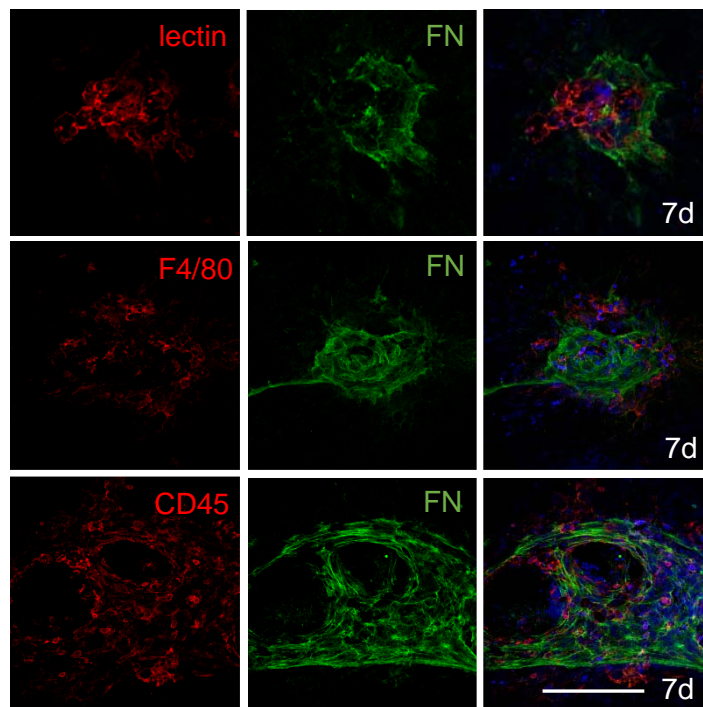

**Figure S4.** Representative images show flat-mounted RPE-choroid complexes isolated from wild type mice at 7 dpi. Samples with laser-induced lesions were immunostained with antibodies against fibronectins (FN), F4/80, CD45 or lectins. All samples were counter-stained with DAPI (blue) (n=5). Scale bars: 100 $\mu$ m.
